# Supplementary material for: Outcomes of transmediastinal esophagectomy for patients with esophagogastric junction cancers
Source: Research Square preprint supplement (doi:10.21203/rs.3.rs-8519700/v1), 2026-01-19
Supplement: Supplementary file 1 [file f2526b0a1bde7b0bedc66efc.pdf]

## **Supplementary information**

**Supplementary Figure 1.** Approach used for mediastinal LN dissection

**Supplementary Figure 2.** Overall survival according to (a) tumor histology and (b) the presence of postoperative complications.

**Supplementary Table 1.** Recurrence pattern

Supplementary Figure 1

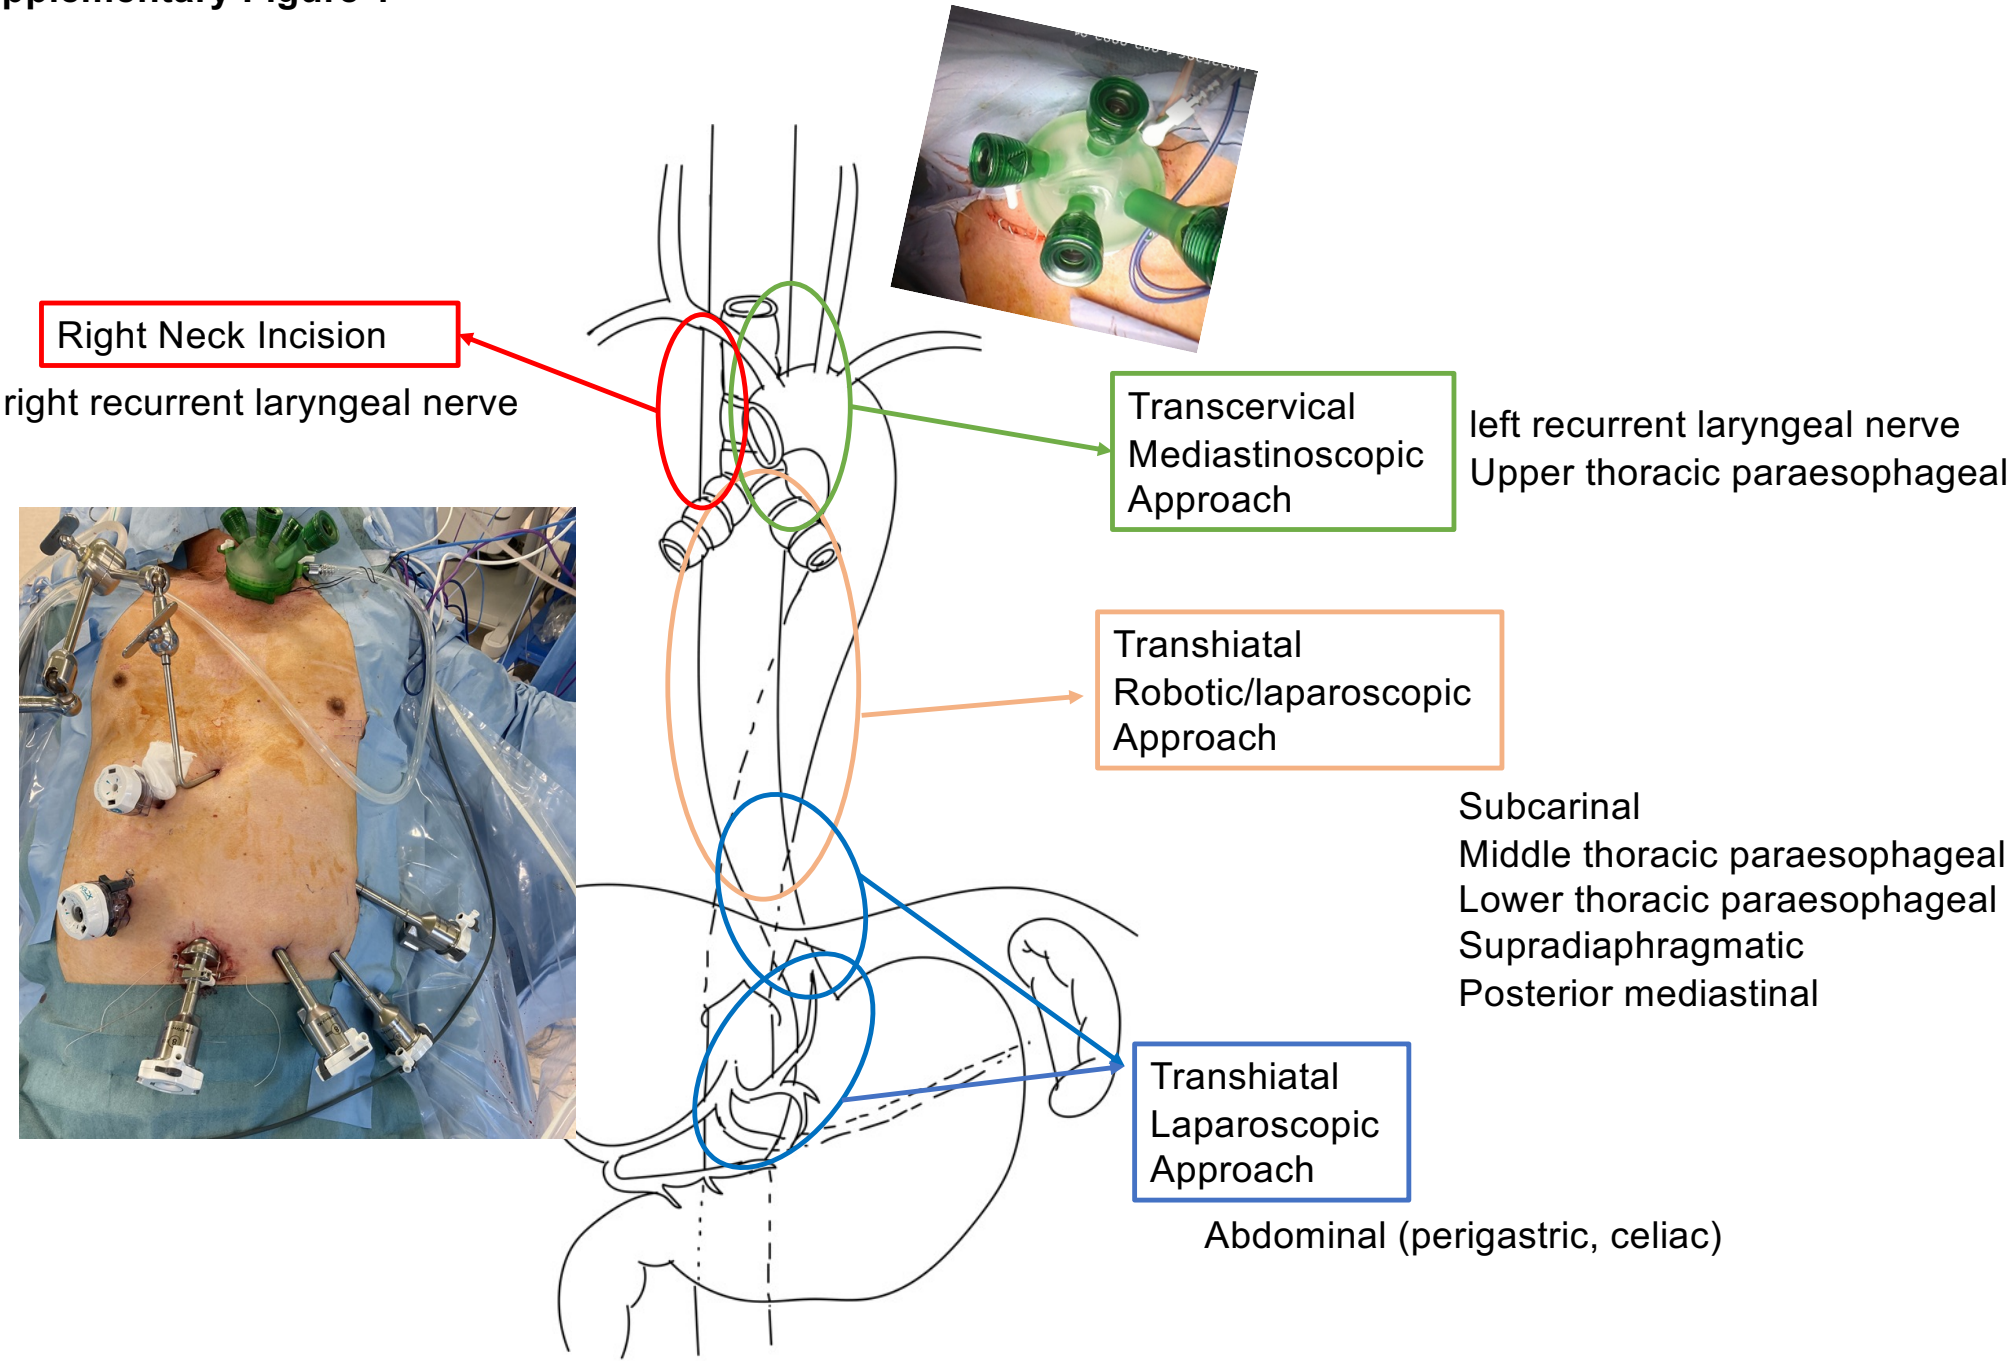

Supplementary Figure 2

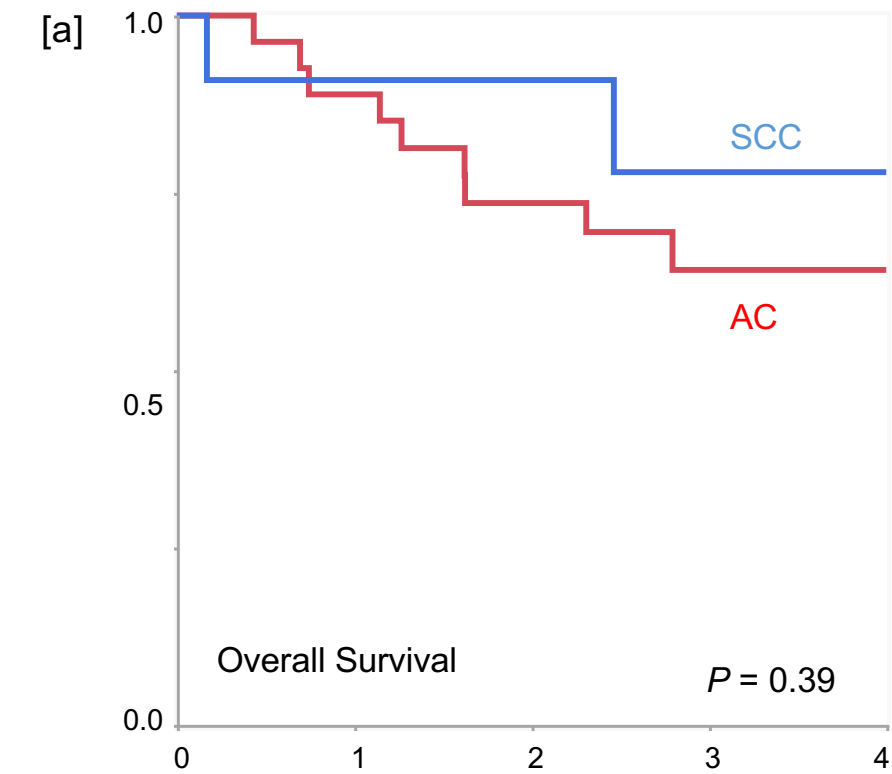

No. at risk

|     |    |    |    |    |   |
|-----|----|----|----|----|---|
| SCC | 11 | 10 | 10 | 7  | 5 |
| AC  | 27 | 25 | 19 | 12 | 6 |

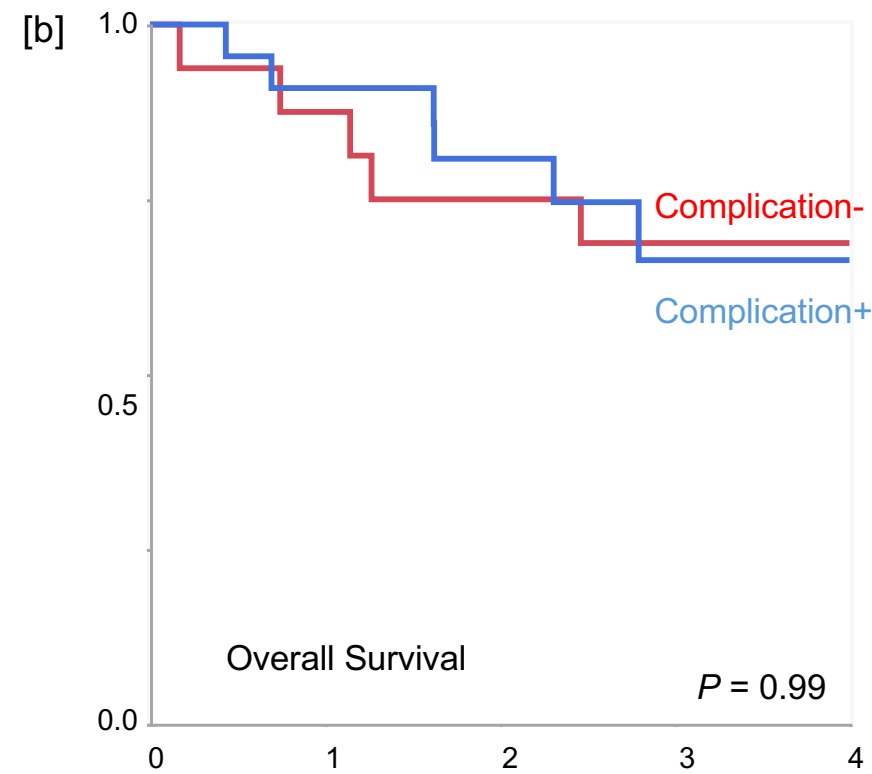

No. at risk

|      |    |    |    |    |   |
|------|----|----|----|----|---|
| Com- | 16 | 15 | 13 | 10 | 4 |
| Com+ | 22 | 20 | 16 | 9  | 6 |

## Supplementary Table 1

| Supplementary Table 1. Recurrence pattern   |                 |
|---------------------------------------------|-----------------|
|                                             | No. of patients |
| Locoregional alone                          | 1 (2.6)         |
| Locoregional + Distant                      | 3 (7.9)         |
| Distant                                     | 12 (31.6)       |
| Liver                                       | 6 (15.8)        |
| Lung                                        | 3 (7.9)         |
| PALN                                        | 3 (7.9)         |
| Peritoneal                                  | 3 (7.9)         |
| Pleural                                     | 1 (2.6)         |
| Abbreviations: PALN, Paraaortic lymph nodes |                 |
